# Supplementary material
Source: Springer Nature journal article supplement (https://www.springermedizin.de/resource/supplementary/13002_2007_114_MOESM2_ESM.pdf/9627194)
Supplement: MOESM2 [file 9627194]

**Additional file 2. Medicinal plants used for treatment of human and /or livestock diseases**

| Scientific name                                          | Family            | Local name           | Herb. Vouch. | Disease treated (local name)                    | L/H         | Part used   | Form used   | MPAP               |
|----------------------------------------------------------|-------------------|----------------------|--------------|-------------------------------------------------|-------------|-------------|-------------|--------------------|
| <i>Abutilon mauritianum</i> (Jacq.) Medic.               | Malvaceae         | Pelampul             | EL154        | Snake bite/ Boffa                               | H           | R           | F           | CT                 |
| <i>Acacia etbaica</i> Schweinf.                          | Fabaceae          | Hamaressa            | EL167        | Inability to walk properly /Dereba              | L           | R           | F/D         | Cdr                |
| <i>Acacia mellifera</i> (Vahl ) Benth.                   | Fabaceae          | Bilala               | EL230        | Kidney/ Birbirti                                | H           | R           | D           | CBdr.              |
| <i>Acacia senegal</i> (L.) Willd.                        | Fabaceae          | Sapansa              | EL170        | Evil spirit/ Ka falfala                         | H           | S           | F/D         | CR                 |
| <i>Acacia seyal</i> Del.                                 | Fabaceae          | Watcho               | EL158        | Breast pain /Dhukuba harma                      | L           | R           | F/D         | Cdr                |
| <i>Acacia tortilis</i> (Forssk.) Hayne                   | Fabaceae          | Dedecha/Kitkita      | EL159        | Problem of removing after birth/ Ka hobati      | L           | L           | F           | Cdr                |
| <i>Acalypha fruticosa</i> Forssk.                        | Euphorbiaceae     | Gurbi dag<br>Hadoftu | EL232        | Tonsilities/ Entil                              | H           | R           | F/D         | Cdr                |
| <i>Acanthospermum hispidum</i> DC.                       | Asteraceae        | Qummuxxi             | EL136        | Sterility in females/ Mehaninet                 | H           | R           | F           | CBdr.              |
| <i>Achyranthes aspera</i> L.                             | Amaranthaceae     | Jibir                | EL104        | Itching sore/ Aro                               | H           | L           | F           | CBdr.              |
| <i>Acokanthera schimperi</i> (A.DC.) Schweinf.           | Apocynaceae       | Kararo               | EL100        | Gonorrhoea/ Chobto                              | H           | RB          | F           | CBdr               |
| <i>Actinopterys radiata</i> (L.) P. Beauv.               | Actinopteridaceae |                      | EL187        | Stabbing pain/ Woransa                          | H           | L           | F           | CT                 |
| <i>Aerangis brachycarpa</i> (A. Rich.) Th. Dur. & Schinz | Orchidaceae       | Muka kulubi          | EL239        | Hemorrhoids/ Qormade                            | H           | L           | F           | CRrb               |
| <i>Ageratum conyzoides</i> L.                            | Asteraceae        |                      | EL87         | Gonorrhoea/ Chobto                              | H           | R           | F           | CBdr.              |
| <i>Allophylus macrobotrys</i> Gilg                       | Sapindaceae       | Chobsa               | EL117        | Impotence /Dhirumalebi                          | H           | R           | D           | Cdr                |
| <i>Aloe gilbertii</i> Sebsebe & Brandham                 | Aloaceae          | Hargessa             | EL209        | Liver case/ Hadhoftu                            | H           | LA          | F           | CEJ                |
| <i>Aloe parvidens</i> Gilbert & Sebsebe                  | Aloaceae          | Hargessa             | EL208        | Stabbing pain/ Woransa                          | H           | LA          | F           | Cdr                |
| <i>Aloe pubescens</i> Reynolds                           | Aloaceae          | Hargessa             | EL207        | Common cold/ Qufa<br>Dhukuba dugda<br>TB /Sombe | L<br>H<br>H | S<br>S<br>S | F<br>D<br>D | CR<br>CBdr.<br>Cdr |

Additional file 2 (continued)

| Scientific name                                              | Family        | Local name     | Herb. Vouch. | Disease treated (local name)                                                                      | L/H              | Part used              | Form used          | MPAP                        |
|--------------------------------------------------------------|---------------|----------------|--------------|---------------------------------------------------------------------------------------------------|------------------|------------------------|--------------------|-----------------------------|
| <i>Aloe pubescens</i> Reynolds                               | Aloaceae      | Hargessa       | EL207        | Kidney /Birbirti<br>Cold /Qilensa                                                                 | H<br>H           | S<br>S                 | F<br>F             | Cex<br>Cex                  |
| <i>Ampelocissus abyssinica</i> (Hochst. ex A. Rich.) Planch. | Vitaceae      | Teru           | EL175        | Black leg/Aba gorba                                                                               | L                | R                      | F/D                | CBdr.                       |
| <i>Anethum graveolens</i> L.                                 | Apiaceae      | Kamona         | EL29         | Eye disease/ Dukuba ija<br>Back pain/ Kale<br>Impotence/ Dhirumalebi<br>Weakness/ Dukubaone       | H<br>H<br>H<br>H | LA<br>L<br>RLSF<br>LSB | F<br>F<br>F<br>F/D | CR<br>Cdr<br>CBdr.<br>CBdr. |
| <i>Asparagus africanus</i> Lam.                              | Asparagaceae  | Argeg          | EL189        | Weakness/ Dukubaone                                                                               | H                | R                      | F                  | CT                          |
| <i>Asparagus leptocladodius</i> Chiov.                       | Asparagaceae  | Seriti         | EL190        | Impotence/ Dhirumalebi<br><br>Liver case /Hadhoftu<br>Rabies/ Dukuba serie<br>Depresssion /Gafila | H<br>H<br>H      | R<br>R<br>L            | F<br>F/D<br>F      | Cdr<br>CBdr.<br>CBdr.       |
| <i>Aspilia gillettii</i> Wild                                | Asteraceae    |                | EL113        | Liver case/ Hadhoftu<br>Abnormal Menustration/ dhiga                                              | H<br>H           | RL<br>L                | F/D<br>D           | CBdr.<br>CT                 |
| <i>Asystasia guttata</i> (Forssk.) Brummitt                  | Acanthaceae   | Baquli         | EL191        | Diarrhoea/ Bassa                                                                                  | H                | R                      | F/D                | CR                          |
| <i>Balanites aegyptica</i> ( L.) Del.                        | Balanitaceae  | Badanna        | EL147        | Evil spirit/Jinni<br>Evil spirit/ Jinni                                                           | H<br>H           | R<br>R                 | F<br>F/D           | CR<br>CR                    |
| <i>Barleria argentea</i> Balf. f.                            | Acanthaceae   | Hokto          | EL194        | Diarrhoea /Albati                                                                                 | H                | RL                     | F                  | Cdr                         |
| <i>Barleria eranthemoides</i> R. Br. ex C. B. Clarke         | Acanthaceae   | Shishi         | EL193        | Stabbing pain/ Woransa<br><br>Cold/ Ka fatime<br>Taenia versicolor/ Barley                        | H<br>H<br>H      | R<br>R<br>L            | F<br>F<br>F        | CR<br>CRrb<br>CR            |
| <i>Bersama abyssinica</i> Fresen.                            | Melianthaceae | kilisa guracha | EL173        | Ascariasis /Magga                                                                                 | H                | L                      | F                  | CBdr.                       |

## Additional file 2 (continued)

| Scientific name                                  | Family         | Local name       | Herb. Vouch. | Disease treated (local name)        | L/H | Part used | Form used | MPAP  |
|--------------------------------------------------|----------------|------------------|--------------|-------------------------------------|-----|-----------|-----------|-------|
| <i>Blyttia fruticosum</i> (Decne.) D.V. Field    | Asclepiadaceae | Joshani          | EL221        | Vomit& diarrhoea/ Wantufa           | H   | SB        | F         | CBdr. |
| <i>Boscia salicifolia</i> Oliv.                  | Capparidaceae  | Qalqalchi qalada | EL111        | Diarrhoea /Tuma                     | L   | RB        | D         | Cdr   |
| <i>Boscia senegalensis</i> Lam. ex Poir.         | Capparidaceae  | Qalqalcha        | EL182        | Headache/ Bowo                      | H   | RL        | F         | CT    |
| <i>Breonadia salicina</i> (Vahl) Hepper and Wood | Rubiaceae      | Erba             | EL142        | Intestinal worms/Maga               | L   | SB        | F/D       | CBdr. |
| <i>Brucea antidysenterica</i> J. F. Mill.        | Simaroubaceae  | kilisa adi       | EL152        | Gonorrhoea/ Chobto                  | H   | L         | F         | CBdr. |
| <i>Caesalpinia volkensii</i> Harms               | Fabaceae       | Sidika           | EL233        | Evil spirit/ Jinni                  | H   | L         | F         | CP    |
|                                                  |                |                  |              | Sterility in females/ Mehaninet     | H   | Se        | D         | Cdr   |
| <i>Calpurnia aurea</i> (Ait.) Benth.             | Fabaceae       | Chekata          | EL76         | Amoebiasis /Dubera                  | H   | S         | F/D       | CBdr. |
|                                                  |                |                  |              | Swelling of nose in mule/ Chachabsa | L   | S         | F/D       | CR    |
|                                                  |                |                  |              | Sore and depression/ Hinjira        | L   | L         | F         | CR    |
|                                                  |                |                  |              | Rabies /Dukuba serie                | H   | R         | F/D       | CPdr  |
|                                                  |                |                  |              | Diarrhoea/ Bassa                    | H   | L         | F/D       | CBdr. |
| <i>Capparis tomentosa</i> Lam.                   | Capparidaceae  | Gombor           | EL121        | Mental disorder/ Ka marata          | H   | R         | F         | CB    |
|                                                  |                |                  |              | Meningites/ Dhukubadhira            | H   | R         | F         | Cdr   |
|                                                  |                |                  |              | Diarrhoea /Tuma                     | L   | F         | D         | Cdr   |
| <i>Caralluma peckii</i> Bally                    | Asclepiadaceae | Hadama           | EL118        | Gonorrhoea/ Chobto                  | H   | R         | F/D       | Cdr   |
| <i>Caralluma speciosa</i> (N.E. Br.) N.E. Br.    | Asclepiadaceae |                  | EL132        | Ascariasis/ Magga                   | H   | R         | F         | CBdr  |
| <i>Carica papaya</i> L.                          | Caricaceae     | Papaya           | EL40         | Anaemia/ Helina diga                | H   | F         | F/D       | Cdr.  |
| <i>Carissa spinarum</i> L.                       | Apocynaceae    | Agamsa           | EL16         | Mental disorder/ Marata             | H   | R         | F         | Csn   |
|                                                  |                |                  |              | Evil spirit/Jinni                   | H   | R         | F         | CR    |
|                                                  |                |                  |              | Evil eye/ Buda                      | H   | R         | F/D       | CR    |
|                                                  |                |                  |              | Rabies/ Dukuba serie                | H   | RB        | F/D       | Cdr   |
|                                                  |                |                  |              | Rabies/ Dukuba serie                | H   | R         | F/D       | CBdr. |

## Additional file 2 (continued)

| Scientific name                                                 | Family         | Local name | Herb. Vouch. | Disease treated (local name)                                                                                                                                                                         | L/H                                  | Part used                             | Form used                                    | MPAP                                                                   |
|-----------------------------------------------------------------|----------------|------------|--------------|------------------------------------------------------------------------------------------------------------------------------------------------------------------------------------------------------|--------------------------------------|---------------------------------------|----------------------------------------------|------------------------------------------------------------------------|
| <i>Carissa spinarum</i> L.                                      | Apocynaceae    | Agamsa     | EL16         | Kidney /Birbirti<br>Skin infection /Beresa                                                                                                                                                           | H<br>H                               | SB<br>R                               | F<br>F                                       | CBdr.<br>CRbo                                                          |
| <i>Cassytha filliformis</i> L.                                  | Lauraceae      | Korsa buda | EL79         | Evil eye / Buda                                                                                                                                                                                      | H                                    | R                                     | F/D                                          | CR                                                                     |
| <i>Catha edulis</i> ( Vahl)<br>Forssk. ex Endl.                 | Celasteraceae  | Chati      | EL26         | Gonorrhoea/ Chobto                                                                                                                                                                                   | H                                    | L                                     | F                                            | CBdr.                                                                  |
| <i>Caucanthus auriculatus</i><br>(Radlk.) Niedenzu              | Malphigiaceae  | Alotu      | EL186        | Evil eye / Buda                                                                                                                                                                                      | H                                    | RB                                    | F                                            | Cdr                                                                    |
| <i>Chenopodium ambrosioides</i> L.                              | Chenopodiaceae | Ajo        | EL4          | Dandruff /Forofori                                                                                                                                                                                   | H                                    | LSS                                   | D                                            | CR                                                                     |
| <i>Chionanthus mildbraedii</i><br>(Gilg & Schellenb.)<br>Stearn | Oleaceae       | Gaggama    | EL183        | Inability of excretion/Dhukuba dira                                                                                                                                                                  | H                                    | RB                                    | F                                            | CBdr.                                                                  |
| <i>Cissampelos pareira</i> L.                                   | Menispermaceae | Baltoke    | EL77         | Evil eye/ Buda<br>Impotence/ Dhirumalebi<br>Kidney /Birbirti<br>Amoebiasis/ Dubera<br>Abnormal Menstruation/ .Dhukuba<br>dhiga<br>Constipation/ Ka mara<br>Diarrhoea /Tuma<br>Stabbing pain/ Woransa | L<br>H<br>H<br>H<br>H<br>H<br>H<br>H | R<br>R<br>RL<br>R<br>R<br>R<br>R<br>R | F<br>D<br>F/D<br>F<br>F/D<br>F<br>F/D<br>F/D | Cdr/Cp<br>Cdr<br>Cdr<br>CBdr.<br>CBf<br>CBdr.<br>Cdr<br>CBdr.<br>CBdr. |
| <i>Cissus populnea</i> Guill.<br>and Perr.                      | Vitaceae       | Gangalto   | EL115        | Vomit& diarrhoea /Wantufa                                                                                                                                                                            | H                                    | R                                     | F/D                                          | CBdr.                                                                  |
| <i>Cissus quadrangularis</i> L.                                 | Vitaceae       | Chopi      | EL176        | Gonorrhoea /Chobto                                                                                                                                                                                   | H                                    | R                                     | F                                            | CBdr.                                                                  |
| <i>Citrus limon</i> (L.) Burm.f.                                | Rutaceae       | Lemon      | EL155        | Bleeding nose/ Nasir                                                                                                                                                                                 | H                                    | FL                                    | F/D                                          | Cex                                                                    |
| <i>Citrus medica</i> L.                                         | Rutaceae       | Tiringo    | EL114        | Cold /Kebena<br>Swelling/Gofla                                                                                                                                                                       | H<br>H                               | L<br>L                                | F<br>F/D                                     | Cb<br>CT/Cdr                                                           |
| <i>Clematis hirsuta</i> Perr.<br>and Guill.                     | Ranunculaceae  | Fitti      | EL18         | Naqarssa                                                                                                                                                                                             | L                                    | L                                     | F                                            | CT                                                                     |
| <i>Clematis simensis</i> Fresen.                                | Ranunculaceae  | Fitti      | EL43         | Naqarssa                                                                                                                                                                                             | L                                    | R                                     | F                                            | CT                                                                     |
| <i>Clerodendrum alatum</i><br>Gurke                             | Lamiaceae      | Hawore     | EL70         | Mental disorder /Marata                                                                                                                                                                              | H                                    | R                                     | F                                            | CBdr.                                                                  |

## Additional file 2 (continued)

| Scientific name                                | Family         | Local name     | Herb. Vouch. | Disease treated (local name)                          | L/H    | Part used | Form used  | MPAP          |
|------------------------------------------------|----------------|----------------|--------------|-------------------------------------------------------|--------|-----------|------------|---------------|
| <i>Clerodendrum alatum</i> Gurke               | Lamiaceae      | Hawore         | EL70         | Hepatitis /Dukuba tiru                                | H      | R         | F/D        | CBdr.         |
| <i>Clerodendrum myricoides</i> (Hochst.) Vatke | Lamiaceae      | Marasisa       | EL201        | Mental disorder /Marata                               | H      | RB        | F          | Csn           |
| <i>Clutia abyssinica</i> Jaub. and Spach.      | Euphorbiaceae  |                | EL10         | General malaise /Mich                                 | H      | L         | F          | CR            |
|                                                |                |                |              | Cold /Qilensa                                         | H      | RB        | F          | Cdr           |
|                                                |                |                |              | Skin infection/ Chito                                 | H      | L         | F          | CR            |
| <i>Coccinia grandis</i> (L.) Voigt             | Cucurbitaceae  | Gale           | EL141        | Bloody diarrhoea/ Setea<br>Kidney infection /Birbirti | H<br>H | R<br>R    | F/D<br>F/D | CBdr.<br>CR   |
| <i>Coffea arabica</i> L.                       | Rubiaceae      | Bunna          | EL12         | Stabbing pain /Woransa<br>Kidney infection/ Birbirti  | H<br>H | R<br>L    | F/D<br>F   | Cdr<br>CBdr.  |
| <i>Colocassia esculenta</i> (L.) Schott        | Araceae        | Gondire        | EL196        | Hepatitis /Dukuba tiru<br>Vomit& diarrhoea /Wantufa   | H<br>H | S,Se<br>L | F<br>F     | CBdr.<br>CRrb |
| <i>Combretum hereroense</i> Schinz             | Combretaceae   | Hurufo         | EL148        | Sore /Sibiji                                          | H      | L         | F          | Crb           |
| <i>Commicarpus plumbagineus</i> (Cav.) Standl. | Nyctaginaceae  | Sifa           | EL225        | Stabbing pain /Woransa                                | H      | R         | D          | CBdr.         |
| <i>Convolvulus siculus</i> L.                  | Convolvulaceae | Lelbab         | EL236        | Diarrhoea /Tuma                                       | H      | L         | F/D        | CBdr          |
| <i>Cordia africana</i> Lam.                    | Boraginaceae   | Wodessa        | EL56         | Gastritis/ Agano<br>Sore /Dhukuba mada                | H<br>H | SB<br>L   | F<br>F     | ChSw<br>CT    |
| <i>Crabbea velutena</i> S. Moore               | Acanthaceae    |                | EL59         | Sore/ Sibiji                                          | H      | L         | F          | CR            |
|                                                |                |                |              | Gonorrhoea /Chobto                                    | H      | R         | F          | CBdr          |
|                                                |                |                |              |                                                       |        |           |            |               |
| <i>Crambe hispanica</i> L.                     | Brassicaceae   | Fugul (Arabic) | EL92         | Naqarssa                                              | H      | R         | F          | CBdr.         |
| <i>Crotalaria deserticola</i> Bak. f.          | Fabaceae       |                | EL48         | Naqarssa                                              | H      | R         | D          | CBdr          |

## Additional file 2 (continued)

| Scientific name                                 | Family         | Local name | Herb. Vouch. | Disease treated (local name)        | L/H | Part used | Form used | MPAP  |
|-------------------------------------------------|----------------|------------|--------------|-------------------------------------|-----|-----------|-----------|-------|
| <i>Crotalaria spinosa</i> Hochst. ex Benth.     | Fabaceae       |            | EL161        | Epilepsy in cattle/ Furtu           | L   | L         | F         | Cdr   |
| <i>Croton dichogamus</i> Pax                    | Euphorbiaceae  | Makuffa    | EL101        | Skin infection/Chito/Ikek           | H   | RB        | F/D       | CB    |
|                                                 |                |            |              | Cold/ Qilensa                       | H   | R         | D         | Csm   |
|                                                 |                |            |              | Diarrhoea/Qirt bussa                | L   | R         | D         | Cdr   |
| <i>Croton macrostachyus</i> Del.                | Euphorbiaceae  | Bakanissa  | EL17         | Swelling of nose in mule /Chachabsa | L   | L         | F/D       | CR    |
|                                                 |                |            |              | Epilepsy /Gagabdo                   | H   | SB        | F/D       | Cdr.  |
|                                                 |                |            |              | Epilepsy in cattle /Furtu           | L   | L         | F/D       | CO    |
|                                                 |                |            |              | Hepatitis /Dukuba tiru              | H   | RB        | D         | CE    |
|                                                 |                |            |              | Ascariasis /Maga                    | H   | SBRB      | F/D       | Cdr   |
|                                                 |                |            |              | Epilepsy in cattle /Furtu           | L   | L         | F         | Cex   |
|                                                 |                |            |              | Gonorrhoea /Sure                    | H   | R         | D         | CE    |
| <i>Croton schimperianus</i> Muell. Arg.         | Euphorbiaceae  | Makafta    | EL219        | Evil spirit/ Jinni                  | H   | L         | F/D       | Csm   |
|                                                 |                |            |              | Cold /Qilensa                       | H   | R         | D         | Csm   |
| <i>Cryptostegia grandifolia</i> Roxb. ex R. Br. | Asclepiadaceae | Headache   | EL131        | Sore/ Sibiji                        | H   | L         | F/D       | Crb   |
| <i>Cucumis dipsaceus</i> Ehrenb. ex Spach       | Cucurbitaceae  | Kurera     | EL140        | Meningitis/ Dhukuba dhira           | H   | F         | F         | Cex   |
|                                                 |                |            |              | Hemorrhoid/ Qormade                 | H   | F         | F         | Cex   |
|                                                 |                |            |              | Rabies/ Dukuba serie                | H   | F         | F         | Cex   |
| <i>Cucumis ficifolius</i> A. Rich.              | Cucurbitaceae  | Hanchote   | EL68         | Rabies /Dukuba serie                | H   | R         | F/D       | CPdr  |
|                                                 |                |            |              | Lung disease /Sombe                 | L   | RF        | F         | Cdr   |
|                                                 |                |            |              | Gonorrhoea /Chobto                  | H   | RF        | F/D       | Cdr   |
|                                                 |                |            |              | Jaundice /Alati                     | H   | R         | F/D       | CBdr. |
| <i>Cucurbita pepo</i> L.                        | Cucurbitaceae  | Buke       | EL96         | Epilepsy in cattle /Furtu           | L   | L         | F         | Cdr   |
| <i>Cussonia holstii</i> Harms ex Engl.          | Araliaceae     | Bubiftu    | EL99         | Headache and fever/ Qora            | H   | L         | F         | CR    |
| <i>Cynanchum abyssinicum</i> Decne.             | Asclepiadaceae | Muka Aro   | EL6          | Sore Dukuba /Aro                    | H   | L         | F/D       | Crb   |
| <i>Cynanchum clavidens</i> N.E. Br.             | Asclepiadaceae | Halala     | EL81         | Tenia versicolour/ Barley           | H   | L         | F         | Crb   |

## Additional file 2 (continued)

| Scientific name                                                     | Family        | Local name | Herb. Vouch. | Disease treated (local name)              | L/H | Part used | Form used | MPAP   |
|---------------------------------------------------------------------|---------------|------------|--------------|-------------------------------------------|-----|-----------|-----------|--------|
| <i>Cynoglossum amplifolium</i> Hochst. ex DC.                       | Boraginaceae  | Karchaba   | EL75         | General malaise /Mich                     | H   | L         | F         | CR     |
| <i>Cynoglossum coeruleum</i> Hochst. DC.                            | Boraginaceae  | Matare     | EL66         | General malaise/ Mich                     | H   | L         | F/D       | CR     |
| <i>Cyphostemma cyphopetalum</i> (Fresen.) Descoings ex Wild & Drum. | Vitaceae      | Likime     | EL3          | Impotence /Dhirumalebi                    | H   | R         | D         | Crd    |
|                                                                     |               |            |              | Eye disease /Dukuba ija                   | H   | L         | F         | Cex    |
|                                                                     |               |            |              | Diarrhoea /Tuma                           | L   | R         | F         | Cdr    |
| <i>Cyphostemma dembianense</i> (Chiov.) Vollesen                    | Vitaceae      | Namignata  | EL177        | Coughing only in Horse and Donkey /Killis | L   | R         | F/D       | CR ex  |
|                                                                     |               |            |              | Inability to walk properly /Dereba        | L   | R         | F         | Cdr    |
|                                                                     |               |            |              | Sore /Naffa Goggoysa                      | H   | R         | F/D       | Cdr /P |
| <i>Datura stramonium</i> L.                                         | Solanaceae    | Bengi      | EL241        | Stabbing pain/ Qilensa                    | H   | RF        | D         | CR     |
| <i>Desmodium velutinum</i> (Willd.) DC.                             | Fabaceae      | Hidda Diga | EL11         | Intestinal parasites /Gara muru           | H   | R         | F         | CBdr   |
| <i>Dichrocephala chrysanthemifolia</i> (Bl.) DC.                    | Asteraceae    | Gurbii     | EL88         | Gonorrhoea/ Chobto                        | H   | R         | F         | Cdr    |
| <i>Dioscorea quartiniana</i> A. Rich.                               | Dioscoreaceae | Gishu      | EL108        | Vomit & diarrhoea /Wantufa                | H   | R         | F/D       | CT/Cdr |
|                                                                     |               |            |              | Kidney infection /Birbirti                | L   | R         | F/D       | Cdr    |
|                                                                     |               |            |              | Side pain/ Woransa                        | H   | R         | F         | CBdr.  |
| <i>Dodonaea angustifolia</i> L. f.                                  | Sapindaceae   | Kitkitta   | EL20         | Hemorrhoids/ Qormade                      | H   | RB        | F/D       | CBdr   |
| <i>Dorstenia foetida</i> (Forssk.) Schweinf.                        | Moraceae      | Serbi      | EL138        | Skin infection /Beresa/                   | H   | R         | F         | CRrb   |
| <i>Dyschoriste multicaulis</i> Lindau                               | Acanthaceae   | Qorsa loo  | EL198        | Diarrhoea/ Tuma                           | L   | L         | F/D       | Cdr    |

Additional file 2 (continued)

| Scientific name                                      | Family        | Local name      | Herb. Vouch. | Disease treated (local name)      | L/H | Part used | Form used | MPAP  |
|------------------------------------------------------|---------------|-----------------|--------------|-----------------------------------|-----|-----------|-----------|-------|
| <i>Dyschoriste multicaulis</i> Lindau                | Acanthaceae   | Qorsa loo       | EL198        | Diarrhoea /Tuma                   | L   | SB        | F/D       | Cdr   |
| <i>Echinops amplexicaulis</i> Oliv.                  | Asteraceae    | Kore Hare       | EL21         | Hepatitis /Wansimbira             | H   | R         | F/D       | CBdr  |
| <i>Erianthemum dregei</i> (Eckl and Zeyh.) V. Tiegh. | Loranthaceae  | Derto           | EL41         | Evil spirit /Gini                 | H   | SL        | F/D       | CB    |
|                                                      |               |                 |              | Naqarssa                          | L   | SL        | F/D       | CT    |
|                                                      |               |                 |              | Epilepsy in cattle /Merto         | L   | RSL       | F/D       | Cdr   |
|                                                      |               |                 |              | Sore /Sibiji                      | H   | L         | F         | CRrb  |
| <i>Erythrina brucei</i> Schweinf.                    | Fabaceae      | Wolena          | EL247        | Problem of after birth/ Ka hobati | H   | R         | F         | CBdr. |
| <i>Erythrochlamys spectabilis</i> Gurke              | Lamiaceae     | Qorsa adi michi | EL210        | General malaise/ Mich             | H   | L         | F         | CRrb  |
|                                                      |               |                 |              | Tenia versicolor/ Barley          | H   | L         | F         | Crb   |
| <i>Eucalyptus saligna</i> Sm.                        | Myrtaceae     | Bahir Zaf       | EL89         | Stabbing pain/ Qilensa/           | H   | L         | F         | CB    |
| <i>Euclea divinorum</i> Hiern                        | Ebenaceae     | Meiesa          | EL14         | Gonorrhoea /Chobto                | H   | R         | F/D       | CR    |
|                                                      |               |                 |              | Kidney infection /Birbirti        | H   | SB        | F         | CE    |
|                                                      |               |                 |              | Hepatitis/ Dukuba tiru            | H   | RB        | D         | CE    |
| <i>Euphorbia dumalis</i> S. Carter                   | Euphorbiaceae | Dargu adi       | EL35         | Liver case /Hadhoftu              | H   | R         | F         | Cdr   |
| <i>Euphorbia heterophylla</i> L.                     | Euphorbiaceae | Ananole         | EL218        | Dandruff /Foroforii               | H   | S         | F         | Cex   |
| <i>Euphorbia lophiosperma</i> S. Carter              | Euphorbiaceae | Kelkelcha alati | EL231        | Evil eye/ Buda                    | H   | R         | F/D       | CR    |
| <i>Euphorbia piscidermis</i> M. Gilbert              | Euphorbiaceae | Kolkol          | EL103        | Gonorrhoea /Chobto                | H   | RS        | F         | CBdr. |
|                                                      |               |                 |              | Evil spirit /Ka falfala/          | H   | S         | F/D       | CBdr. |
|                                                      |               |                 |              | Hemorrhoids /Qormade/             | H   | S         | F         | CR    |
|                                                      |               |                 |              | Leprosy /Jusana                   | H   | R         | F         | CE    |
| <i>Euphorbia schimperiana</i> Scheele                | Euphorbiaceae | Robe            | EL36         | Gonorrhoea/ Chobto                | H   | R         | F/D       | CBdr. |
| <i>Faurea speciosa</i> Welw.                         | Proteaceae    | Bobeya          | EL143        | Skin infection/Ikek/ Chito        | H   | RB        | F/D       | Crb   |



## Additional file 2 (continued)

| Scientific name                                           | Family         | Local name      | Herb. Vouch. | Disease treated (local name)           | L/H | Part used | Form used | MPAP  |
|-----------------------------------------------------------|----------------|-----------------|--------------|----------------------------------------|-----|-----------|-----------|-------|
| <i>Garcinia livingstonei</i> T. Anders                    | Clusiaceae     | Abuqurto        | EL27         | Hepatitis /Dukuba tiru                 | H   | R         | F/D       | CBdr. |
|                                                           |                |                 |              | Rabies /Dukuba serie                   | H   | R         | F/D       | CPdr  |
|                                                           |                |                 |              | Urinary tract problem /Dukuba Finchani | H   | R         | F/D       | Cdr   |
| <i>Gardenia ternifolia</i> Schumach. & Thonn.             | Rubiaceae      | Gambella        | EL248        | Headache /Bowo                         | H   | R         | F/D       | Cdr   |
| <i>Gloriosa superba</i> L.                                | Colchicaceae   |                 | EL235        | Pain of chest /Ka Qoma                 | H   | R         | D         | CBdr. |
| <i>Gnidia stenophylla</i> Gilg                            | Thymaelaceae   | Harmala Tiqishu | EL7          | Epilepsy/ Gagabdo                      | H   | R         | F/D       | CBdr  |
|                                                           |                |                 |              | Inability to walk properly /Dereba     | L   | R         | F/D       | Cdr   |
|                                                           |                |                 |              | Cold /Qilensa                          | H   | R         | F/D       | Cdr   |
|                                                           |                |                 |              | Intestinal parasites /Gara muru        | H   | R         | F/D       | CBdr. |
|                                                           |                |                 |              | Hemorrhoids /Qormade                   | H   | R         | F/D       | Crb   |
|                                                           |                |                 |              | Gonorrhoea/ Chobto                     | H   | R         | F/D       | CBdr. |
|                                                           |                |                 |              | Sore Dhukuba/ mada                     | H   | L         | F/D       | Crb   |
| <i>Gomphocarpus fruticosus</i> (L.) Ait. F                | Asclepiadaceae | Dibe galla      | EL133        |                                        |     |           |           |       |
| <i>Gomphocarpus integer</i> (N.E. Br.) Bullock            | Asclepiadaceae | Harmala         | EL222        | Gastritis /Agano                       | H   | RL        | F         | Cdr   |
|                                                           |                |                 |              | Sore /Sibiji                           | H   | L         | F/D       | CT    |
|                                                           |                |                 |              | Gonorrhoea/ Chobto                     | H   | R         | F/D       | CE    |
|                                                           |                |                 |              | Hemorrhoids/ Qormade                   | H   | RL        | F         | CR    |
|                                                           |                |                 |              | Kidney /Birbirti                       | H   | R         | F/D       | CBdr. |
|                                                           |                |                 |              | Gonorrhoea/ Chobto                     | H   | R         | F         | CE    |
|                                                           |                |                 |              | Skin infection/Ikek/ Chito             | H   | L         | F         | Crb   |
| <i>Gossypium arboreum</i> L.                              | Malvaceae      | Gibir           | EL25         |                                        |     |           |           |       |
| <i>Grewia ferruginea</i> Hochst. ex A. Rich               | Tiliaceae      | Hinshilo        | EL217        | Constipation /Ka mara                  | H   | RL        | F         | Cdr   |
|                                                           |                |                 |              | Diarrhoea /Tuma                        | L   | SB        | F/D       | Cdr   |
| <i>Harrisonia abyssinica</i> Oliv.                        | Simaroubaceae  | Tebenai         | EL95         | Inability to walk properly /Dereba     | L   | RL        | D         | Cdr   |
| <i>Heteromorpha arborescens</i> (Spreng.) Cham. & Schldl. | Apiaceae       | Alhanka         | EL30         | Aggressiveness in cows /Dhoitu         | L   | L         | F         | Cex   |
| <i>Hibiscus luduwigii</i> Eckl. and Zeyh.                 | Malvaceae      | Bulanbula       | EL179        | Diarrhoea /Bassa                       | H   | R         | F/D       | Cdr   |

## Additional file 2 (continued)

| Scientific name                               | Family         | Local name   | Herb. Vouch. | Disease treated (local name)         | L/H | Part used | Form used | MPAP  |
|-----------------------------------------------|----------------|--------------|--------------|--------------------------------------|-----|-----------|-----------|-------|
| <i>Hydnoria johannis</i> Becc.                | Hydnoraceae    | Thuqa        | EL78         | Swelling of facial part/ Bofe        | L   | R         | F         | Cdr   |
| <i>Indigofera amorphoides</i> Jaub. and Spach | Fabaceae       | Gurbi adi    | EL162        | Lung disease /Sombe                  | H   | R         | F         | CBdr  |
| <i>Indigofera dauensis</i> Gillett            | Fabaceae       | Korsa Birti  | EL128        | Evil eye /Buda                       | H   | R         | F/D       | CT    |
| <i>Indigofera spicata</i> Forssk.             | Fabaceae       | Gurbi        | EL166        | Tenia versicolor /Barley             | H   | R         | F/D       | CR    |
|                                               |                |              |              | Diarrhoea/ Bassa                     | H   | R         | F         | CBdr. |
|                                               |                |              |              | Constipation /Mara                   | H   | SB        | F         | Cdr   |
|                                               |                |              |              | Abnormal menstruation /Dhukuba dhiga | H   | R         | F/D       | CBdr. |
| <i>Inula decipiens</i> E. A. Bruce            | Asteraceae     | Tamboborofa  | EL135        | Sore/ Sibiji                         | H   | R         | F         | Crb   |
| <i>Inula paniculata</i> (Klatt) Burt-Davy     | Asteraceae     | Kora         | EL51         | Urinary tract problem / Finchani     | H   | R         | F/D       | Cdr   |
| <i>Jasminum schimperi</i> Vatke               | Oleaceae       | Ilu          | EL1          | Evil spirit/ Gini                    | H   | R         | D         | CR    |
| <i>Jatropha curcas</i> L.                     | Euphorbiaceae  | Abatal buluk | EL34         | Headache/ Bowo                       | H   | Se        | F         | CR    |
| <i>Justicia diclipteroides</i> Lindau         | Acanthaceae    |              | EL60         | Sore /Dhukuba mada                   | H   | L         | D         | CR    |
| <i>Justicia odora</i> (Forssk.) Lam.          | Acanthaceae    | Loketo       | EL237        | Depression/ Gafla                    | H   | R         | F/D       | CBdr. |
| <i>Kalanchoe laciniata</i> (L.) DC.           | Crassulaceae   | Kontukature  | EL139        | Tenia versicolor /Barley             | H   | L         | F         | CR    |
|                                               |                |              |              | Eye disease/ Dukuba ija              | H   | L         | F/D       | Cex   |
| <i>Kalanchoe petitiiana</i> A. Rich.          | Crassulaceae   | Hanchura     | EL94         | Intestinal parasites /Gara muru      | H   | R         | D         | Cdr   |
| <i>Kanahia carlsbergiana</i> Field et al.     | Asclepiadaceae | Kertassa     | EL82         | Sore /Sibiji                         | H   | L         | D         | Cpa   |
| <i>Kleinia abyssinica</i> (A. Rich) A. Berger | Asteraceae     | Burka        | EL84         | Vomit& diarrhoea /Wantufa            | H   | R         | F/D       | CBdr. |
| <i>Kleinia squarrosa</i> Cufod.               | Asteraceae     | Luqo         | EL229        | Cold /Kebena                         | H   | R         | D         | Cb    |
| <i>Lagenaria siceraria</i> (Molina) Standl.   | Cucurbitaceae  | Buke         | EL28         | Evil spirit /JinniGini               | H   | F         | F         | CT    |

Additional file 2 (continued)

| Scientific name                                | Family        | Local name   | Herb. Vouch. | Disease treated (local name)         | L/H | Part used | Form used | MPAP   |
|------------------------------------------------|---------------|--------------|--------------|--------------------------------------|-----|-----------|-----------|--------|
| <i>Laggera crispata</i> (Vahl) Hepper and Wood | Asteraceae    | Dedeho       | EL134        | Abnormal menstruation/.Dhukuba dhiga | H   | L         | F         | CT     |
| <i>Lannea schimperi</i> (A. Rich.) Engl.       | Anacardiaceae | Enxxilif     | EL13         | Skin infection /Chito                | H   | L         | D         | Crb    |
| <i>Lantana camara</i> L.                       | Verbenaceae   |              | EL200        | Skin infection/Chito/Ikek            | H   | L         | F         | CRrb   |
|                                                |               |              |              | Gonorrhoea /Sure                     | H   | R         | F/D       | CBdr.  |
|                                                |               |              |              | Evil eye /Buda                       | L   | R         | F         | Cdr/Cp |
| <i>Lantana trifolia</i> L.                     | Verbenaceae   | Medandubra   | EL64         | Sore /Mada                           | H   | R         | D         | CP     |
|                                                |               |              |              | General malaise /Mich                | H   | L         | F         | CR     |
|                                                |               |              |              | Gonorrhoea/ Sure                     | H   | R         | F/D       | CBdr.  |
|                                                |               |              |              | Evil eye /Buda                       | L   | R         | F         | Cdr/Cp |
| <i>Lantana viburnoides</i> (Forssk.) Vahl      | Verbenaceae   | Medandubra   | EL67         | Jaundice/ Shinbira                   | H   | R         | D         | CR     |
|                                                |               |              |              | Evil eye/ Buda                       | H   | RL        | F/D       | CBdr.  |
| <i>Launea intybacea</i> (Jacq.) Beauv.         | Asteraceae    | Lalessa      | EL52         | Impotence/ Dhirumalebi               | H   | R         | F/D       | CBdr.  |
| <i>Lepidotrichillia volkensii</i> (Gurke) Ler. | Meliaceae     | Sakero       | EL249        | Kidney /Birbirti                     | H   | Se        | F         | Cex    |
| <i>Lippia javanica</i> (Burm. f.) Spreng.      | Verbenaceae   | Sukahi       | EL65         | Diarrhoea /Albati                    | H   | L         | F         | Cdr    |
|                                                |               |              |              | Jaundice /Alati                      | H   | RL        | D         | CR     |
|                                                |               |              |              | Kidney disorder /Kulalit             | H   | L         | D         | Cdr    |
|                                                |               |              |              | Evil eye /Buda/                      | H   | RL        | D         | Cdr    |
| <i>Maesa lanceolata</i> Forssk.                | Myrsinaceae   | Dhunda/Abeyi | EL42         | Skin infection/Chito/Ikek            | L   | Se        | D         | CPa    |
| <i>Maytenus arbutifolia</i> (A. Rich.) Wilczek | Celasteraceae | Kombolcha    | EL47         | Wound/Madda/Dhita                    | L   | L         | F         | CT     |
| <i>Maytenus senegalensis</i> (Lam.) Exell      | Celasteraceae | Kombolcha    | EL45         | Evil eye /Buda/                      | H   | L         | F         | Csm    |
| <i>Melia azedarach</i> L.                      | Meliaceae     | Lucimia      | EL91         | Ascariasis /Maga                     | H   | L         | D         | Cdr    |
| <i>Microglossa pyrifolia</i> (Lam.) Kuntze     | Asteraceae    | Halalchu     | EL144        | Tenia versicolor /Barley             | H   | L         | F         | Crb    |

Additional file 2 (continued)

| Scientific name                                                  | Family        | Local name   | Herb. Vouch. | Disease treated (local name)                          | L/H | Part used | Form used | MPAP         |
|------------------------------------------------------------------|---------------|--------------|--------------|-------------------------------------------------------|-----|-----------|-----------|--------------|
| <i>Mimusops kummel</i> A. DC.                                    | Sapotaceae    | Qolati       | EL151        | Sterility in females /Mehaninet                       | H   | SB        | F         | Cdr.         |
| <i>Myrsine africana</i> L.                                       | Myrsinaceae   | Kechemsa     | EL49         | Womb disorder /Hormata berra<br>Skin infection /Chito | H   | RS<br>L   | D<br>F    | Cdr.<br>CRrb |
| <i>Nicotiana tabacum</i> L.                                      | Solanaceae    | Tambo        | EL246        | Epilepsy /Gagabdo                                     | H   | R         | D         | Cdr.         |
| <i>Ocimum gratissimum</i> L.                                     | Lamiaceae     | Dama Kessie  | EL71         | Epilepsy in cattle/ Furtu                             | L   | L         | F         | Cdr.         |
| <i>Ocimum gratissimum</i> L.                                     | Lamiaceae     | Dama Kessie  | EL72         | General malaise /Mich                                 | H   | L         | F         | Cdr.         |
| <i>Ocimum spicatum</i> Defl.                                     | Lamiaceae     | Gurbi hare   | EL214        | Eye disease/ Dukuba ija                               | H   | L         | F         | Cex          |
| <i>Ocimum urticifolium</i> Roth                                  | Lamiaceae     | Korsa michi  | EL69         | Tenia versicolor/ Barley                              | H   | L         | F         | CRrb         |
| <i>Olea europaea</i> L. subsp. <i>Cuspidata</i> (Wall. ex G.Don) | Oleaceae      | Ejersa       | EL19         | General malaise/ Mich<br>Leprosy /Jusana              | H   | RS        | F         | Distillation |
| <i>Olinia rochetiana</i> A. Juss.                                | Oliniaceae    | Guna         | EL102        | Mental disorder /Merata                               | H   | L         | F/D       | CBdr.        |
| <i>Ormocarpum trichocarpum</i> (Taub.) Engl.                     | Fabaceae      | Bute         | EL125        | Urinary tract problem/ Finchani                       | H   | L         | F         | Cdr.         |
| <i>Osyridocarpus schimperanus</i> (A. Rich.) A. DC.              | Santalaceae   | Muca guracha | EL122        | Stabbing pain/ Woransa                                | H   | L         | F/D       | CBdr.        |
| <i>Osyris quadripartita</i> Decn.                                | Santalaceae   | Wato         | EL211        | Stabbing pain /Woransa                                | H   | L         | F/D       | CBdr.        |
| <i>Ozoroa insignis</i> Del.                                      | Anacardiaceae | Dheri        | EL180        | Swelling of legs /Kurkassa                            | L   | R         | F/D       | Cdr.         |
| <i>Pentanopsis fragrans</i> Rendle                               | Rubiaceae     | Kurso        | EL216        | Jaundice /Alati                                       | H   | L         | F         | Cdr.         |
| <i>Pentas lanceolata</i> (Forssk.) Defl.                         | Rubiaceae     | Dhumuga      | EL213        | Pus from an ear /Dhukba guraa                         | H   | RB        | D         | CR           |
|                                                                  |               |              |              | Gonorrhoea /Chobto                                    | H   | L         | F/D       | CBdr.        |
|                                                                  |               |              |              | Snakebite /Buti                                       | H   | RL        | F         | CRrb         |
|                                                                  |               |              |              | Gastritis /Agano                                      | H   | L         | F/D       | CBdr.        |
|                                                                  |               |              |              | Stabbing pain/ Woransa/                               | H   | L         | F/D       | CBdr.        |

Additional file 2 (continued)

| Scientific name                                           | Family         | Local name | Herb. Vouch. | Disease treated (local name)             | L/H | Part used | Form used | MPAP  |
|-----------------------------------------------------------|----------------|------------|--------------|------------------------------------------|-----|-----------|-----------|-------|
| <i>Periploca linearifolia</i><br>Quart. -Dill. & A. Rich. | Asclepiadaceae | Sarkutal   | EL83         | Sore /Boffa                              | L   | SL        | F/D       | CT    |
| <i>Phyllanthus sepialis</i><br>Muell. Arg.                | Euphorbiaceae  | Sumalfer   | EL2          | Tooth ache /Dhukuba Hilkanii             | H   | R         | F         | CRch  |
| <i>Phytolacca dodecandra</i><br>L'.Herit.                 | Phytolacaceae  | Handode    | EL243        | Gonorrhoea/ Chobto                       | H   | R         | F/D       | CBdr. |
| <i>Pittosporum viridiflorum</i><br>Sims                   | Pittosporaceae | Ara        | EL212        | Stabbing pain/ Woransa                   | H   | SB        | F/D       | Cdr.  |
| <i>Plumbago zeylanica</i> L.                              | Plumbaginaceae | Digagi     | EL58         | Kidney /Birbirti                         | H   | R         | F         | CBdr. |
| <i>Podocarpus falcatus</i><br>(Thunb.) Mirb.              | Podocarpaceae  | Birbirsa   | EL197        | Naqarssa<br>Womb disorder/ Lo'o          | H   | Rr        | D         | CP    |
| <i>Portulaca oleracea</i> L.                              | Portulacaceae  | Doma       | EL123        | Nakarssa                                 | H   | R         | F         | CBdr. |
| <i>Premna schimperi</i> Engl.                             | Lamiaceae      | Urgessa    | EL202        | Fire accident/ Ibida Nama Gubi           | H   | L         | F         | CPa   |
| <i>Prunus perisca</i> (L.)<br>Batsch                      | Rosaceae       | Kok        | EL32         | Constipation and fever/ Oogera           | H   | L         | F/D       | Cdr   |
| <i>Psidium guagava</i> L.                                 | Myrtaceae      | Zeyituna   | EL38         | Hepatitis /Wansimbira                    | H   | Se        | D         | CBdr  |
| <i>Psychotria kirkii</i> Hiern                            | Rubiaceae      | Muka bofa  | EL168        | Snake bite /Bofa                         | H   | RL        | D         | Cdr   |
| <i>Psychotria orophila</i> Petit                          | Rubiaceae      | Ulaga      | EL15         | General malaise /Mich<br>Jaundice /Alati | H   | L         | F         | CRrb  |
|                                                           |                |            |              | Eye disease /Dukuba ija                  | H   | RL        | F/D       | Cdr   |
| <i>Psydrax schimperiana</i> (A.<br>Rich.) Bridson         | Rubiaceae      | Gallo      | EL165        | TB /Sombe                                | H   | R         | F/D       | CBdr. |
| <i>Pterocephalus frutescens</i><br>Hochst. ex A. Rich.    | Dipsacaceae    |            | EL116        | General malaise/ Mich                    | H   | L         | F         | CR    |
| <i>Pterolobium stellatum</i><br>(Forssk.) Brenan          | Fabaceae       | Kejima     | EL46         | Sore/ Sibiji                             | H   | L         | F         | Cdr   |
|                                                           |                |            |              | Stabbing pain /Woransa                   | H   | R         | F/D       | CBdr. |
| <i>Pyrenacantha malvifolia</i><br>Engl.                   | Icacinaceae    | Buri       | EL106        | Snakebite /Buti                          | H   | R         | F/D       | CT    |

## Additional file 2 (continued)

| Scientific name                                       | Family         | Local name   | Herb. Vouch. | Disease treated (local name)          | L/H | Part used | Form used | MPAP  |
|-------------------------------------------------------|----------------|--------------|--------------|---------------------------------------|-----|-----------|-----------|-------|
| <i>Rhoicissus tridentata</i> (L. f.) Wild. & Drummond | Vitaceae       |              | EL178        | Abnormal menstruation/.Dhukuba dhiga  | H   | RS        | F         | CBdr. |
| <i>Rhus natalensis</i> Krauss                         | Anacardiaceae  |              | EL120        | Abnormal menstruation/.Dhukuba dhiga  | H   | RB        | D         | Cdr   |
| <i>Rhynchosia densiflora</i> (Roth) DC.               | Fabaceae       |              | EL54         | Vomit and Diarrhoea /Gudiftu/Wanejole | H   | R         | F         | CR    |
| <i>Rhynchosia elegans</i> A. Rich.                    | Fabaceae       | Shabee       | EL164        | Jaundice /Alati/                      | H   | R         | F/D       | Cdr   |
| <i>Rhynchosia ferruginea</i> A. Rich.                 | Fabaceae       |              | EL55         | Evil eye/ Buda                        | L   | RL        | F         | Cdr   |
| <i>Ricinus communis</i> L.                            | Euphorbiaceae  |              | EL33         | Gonorrhoea /Chobto                    | H   | R         | F         | Cex   |
| <i>Rubia cordifolia</i> L.                            | Rubiaceae      | Lalessa      | EL53         | Impotence/ Dhirumalebi                | H   | R         | D         | Cdr   |
|                                                       |                |              |              | Pus from an ear/ Dhukba guraa         | H   | F         | F         | Cex   |
|                                                       |                |              |              | Gonorrhoea/ Chobto                    | H   | R         | F/D       | CBdr. |
|                                                       |                |              |              | General malaise/ Mich                 | H   | L         | F         | Cdr   |
| <i>Rubus steudneri</i> Schweinf.                      | Rosaceae       | Goora        | EL242        | Headache/ Bowo                        | H   | S         | F         | Cex   |
|                                                       |                |              |              | Gonorrhoea /Chobto                    | H   | L         | F/D       | CBdr. |
| <i>Rumex nepalensis</i> Spreng.                       | Polygonaceae   | Shabee       | EL24         | Diarrhoea/ Bassa                      | H   | R         | F         | CR    |
|                                                       |                |              |              | Naqarssa                              | H   | R         | D         | Cdr   |
| <i>Ruta chalepensis</i> L.                            | Rutaceae       | Siliti       | EL37         | Common cold /Qufa                     | H   | L         | F/D       | CBdr  |
| <i>Sansevieria ehrenbergii</i> Schweinf. ex Bak.      | Dracenaceae    | Muka koricha | EL238        | Swelling/Ebach/Gofla                  | H   | RB        | F/D       | CT    |
| <i>Satureja abyssinica</i> (Benth.) Briq.             | Lamiaceae      | Korsa qufa   | EL61         | Common cold/ Qufa                     | H   | L         | F         | CBdr. |
| <i>Sclerocarya birrea</i> (A. Rich.) Hochst.          | Anacardiaceae  | Udha         | EL184        | Kidney/ Birbirti                      | H   | SB        | F/D       | CBdr  |
| <i>Secamone parvifolia</i> (Oliv.) Bullock            | Asclepiadaceae | Kiki         | EL228        | <i>Naqarssa</i>                       | L   | L         | F         | CT    |
| <i>Senna occidentalis</i> (L.) Link                   | Fabaceae       | Hawacho      | EL44         | Loss of appetite /Albti kutu          | H   | SB        | D         | Cdr   |
|                                                       |                |              |              | Gonorrhoea /Chobto                    | H   | RB        | F/D       | CBdr. |

## Additional file 2 (continued)

| Scientific name                                                     | Family         | Local name   | Herb. Vouch. | Disease treated (local name)                                                                | L/H              | Part used         | Form used        | MPAP                       |
|---------------------------------------------------------------------|----------------|--------------|--------------|---------------------------------------------------------------------------------------------|------------------|-------------------|------------------|----------------------------|
| <i>Senna occidentalis</i> (L.) Link                                 | Fabaceae       | Hawacho      | EL44         | Gonorrhoea /Chobto                                                                          | H                | R                 | F                | CBdr.                      |
| <i>Senna petersiana</i> (Bolle) Lock                                | Fabaceae       | Odusalem     | EL172        | Jaundice /Alati                                                                             | H                | L                 | F                | CBdr                       |
| <i>Senna septemtrionalis</i> (Viv.) Irwin and Barneby               | Fabaceae       | Simamak      | EL171        | Hemorrhoids/ Qormade                                                                        | H                | RB                | F/D              | CRrb                       |
| <i>Sesamum indicum</i> L.                                           | Pedaliaceae    | Selit        | EL188        | Swelling/Dula Binguge<br>Mental disorder/Marata                                             | H<br>H           | L<br>Se           | F<br>D           | CT<br>Cdr                  |
| <i>Sida collina</i> Schlechtend.                                    | Malvaceae      | Weed         | EL127        | Evil eye/ Buda                                                                              | H                | R                 | D                | Cdr                        |
| <i>Sida ovata</i> Forssk.                                           | Malvaceae      | Urgosiwaka   | EL126        | Infections/Gemogi                                                                           | L                | RL                | F/D              | Cdr                        |
| <i>Sida schimperiana</i> A. Rich                                    | Malvaceae      | Misira       | EL153        | Impotence /Dhirumalebi                                                                      | H                | RL                | D                | CBdr.                      |
| <i>Solanum giganteum</i> Jacq.                                      | Solanaceae     |              | EL205        | Diarrhoea /Bassa                                                                            | H                | R                 | F/D              | CBdr.                      |
| <i>Solanum incanum</i> L.                                           | Solanaceae     | Hiddi        | EL63         | Headache/ Bowo<br>Impotence /Dhirumalebi<br>Epilepsy in cattle/ Furtu<br>Gonorrhoea/ Chobto | H<br>H<br>L<br>H | RB<br>R<br>R<br>R | F<br>F<br>F<br>F | Cex<br>CBdr.<br>Cex<br>Cex |
| <i>Steganotaenia araliacea</i> Hochst. ex A. Rich.                  | Apiaceae       | Boboftu      | EL149        | Jaundice /Alati                                                                             | H                | L                 | F/D              | Cdr                        |
| <i>Stephania abyssinica</i> (Dillon and A. Rich) Walp.              | Menispermaceae | Kalala       | EL130        | Vomit and fever/Dingetegna                                                                  | H                | R                 | F                | Cdr.                       |
| <i>Stomatanthus africanus</i> (Oliv. & Hiern) R. M. King and H. Rob | Asteraceae     | Sara guracha | EL145        | Jaundice /Alati<br>Headache/ Bowo                                                           | H<br>H           | RL<br>L           | F<br>F/D         | Cdr<br>Cdr.                |
| <i>Suregada procera</i> (Prain) Croizat                             | Euphorbiaceae  | Xillo        | EL185        | Gonorrhoea/ Chobto                                                                          | H                | RB                | D                | CBdr                       |
| <i>Syzygium guineense</i> (Willd.) DC.                              | Myrtaceae      | Unoma        | EL39         | Skinny cattles /Honoma<br>Urinary tract problem /Dukuba Finchani                            | L<br>H           | Rr<br>RB          | D<br>F/D         | Cdr<br>CBdr                |

## Additional file 2 (continued)

| Scientific name                                             | Family         | Local name    | Herb. Vouch. | Disease treated (local name)           | L/H | Part used | Form used | MPAP  |
|-------------------------------------------------------------|----------------|---------------|--------------|----------------------------------------|-----|-----------|-----------|-------|
| <i>Talinum caffrum</i> (Thunb.) Eckl. and Zeyh.             | Portulacaceae  | Burka         | EL224        | Stabbing pain /Woransa                 | H   | R         | F/D       | Cdr   |
| <i>Talinum portulacifolium</i> (Forssk.) Asch. ex Schweinf. | Portulacaceae  | Joshani       | EL223        | Hemorrhoids /Qormade                   | H   | RB        | D         | CR    |
| <i>Tamarindus indica</i> L.                                 | Fabaceae       | Roka          | EL107        | Tapeworm /Kosso                        | H   | Se        | F/D       | CE    |
| <i>Terminallia brownii</i> Fresen.                          | Combretaceae   | Birdhesa      | EL119        | Jaundice/ Alati                        | H   | RB        | F         | CB    |
| <i>Thalictrum rhyngocarpum</i> Dill. & A. Rich.             | Ranunculaceae  | Bala/Sirebizu | EL535        | Stabbing pain/Woransa                  | H   | R         | F/D       | CBdr. |
| <i>Tinnea somalensis</i> Gurke ex Chiov.                    | Lamiaceae      | Kertatumi     | EL62         | Ascariasis/ Magga                      | H   | L         | D         | CBdr  |
| <i>Tinospora caffra</i> (Miers) Troupin                     | Menispermaceae | Buri          | EL74         | Buda/ Evil eye                         | L   | R         | F         | Cdr   |
| <i>Toddalia asiatica</i> (L.) Lam.                          | Rutaceae       | Kundo         | EL97         | Intestinal parasites/ Gara muru        | H   | L         | F         | CE    |
| <i>Tragia brevipes</i> Pax                                  | Euphorbiaceae  | Lalesa        | EL93         | Urinary tract problem /Dukuba Finchani | H   | R         | F         | CT    |
| <i>Trichilia dregeana</i> Sond.                             | Meliaceae      | Menisa        | EL226        | Jaundice /Alati                        | H   | R         | F         | Cdr   |
| <i>Trichilia emetica</i> Vahl                               | Meliaceae      | Botoro        | EL90         | Gonorrhoea /Chobto                     | H   | RB        | D         | CBdr  |
| <i>Trichodesma uniflora</i> Brand                           | Boraginaceae   |               | EL195        | Bassa/Diarrhoea                        | L   | SB        | D         | Cdr   |
| <i>Triumfetta heterocarpa</i> Sprague and Hutch.            | Tiliaceae      | Gurbi hola    | EL146        | Sore /Sibiji                           | H   | RB        | F         | CRrb  |
| <i>Vepris dainellii</i> (Pchi-Serm) Kokwaro                 | Rutaceae       | Arabe         | EL110        | Jaundice /Alati                        | H   | R         | F         | CBdr  |
| <i>Vernonia amygdalina</i> Del.                             | Asteraceae     | Ebicha        | EL22         | Malaria/ Bussa                         | H   | F         | F         | Cdr.  |
| <i>Vernonia auriculifera</i> Hiern.                         | Asteraceae     | Ebicha        | EL85         | Buda/ Evil eye                         | L   | L         | F         | Cdr   |
|                                                             |                |               |              | Diarrhoea /Tuma                        | L   | L         | F/D       | Cdr   |



Additional file 2 (continued)

| Scientific name                                 | Family      | Local name   | Herb. Vouch. | Disease treated (local name)                                         | L/H         | Part used   | Form used     | MPAP                  |
|-------------------------------------------------|-------------|--------------|--------------|----------------------------------------------------------------------|-------------|-------------|---------------|-----------------------|
| <i>Vernonia myriantha</i> Hook. f.              | Asteraceae  | Ragi         | EL129        | Abnormal menstruation /Dhiga                                         | H           | L           | F             | CT                    |
| <i>Vernonia wollastonii</i> S. Moore            | Asteraceae  | Hida gabro   | EL86         | Diarrhoea/Albati                                                     | H           | RB          | F             | Cdr                   |
| <i>Vigna heterophylla</i> A. Rich.              | Fabaceae    | Uhdualem     | EL124        | Mental disorder /Merata<br>Headache/ Bowo                            | H<br>H      | RL<br>R     | F/D<br>F/D    | CBdr.<br>CP           |
| <i>Vigna membrenacea</i> A. Rich.               | Fabaceae    | Ropi         | EL163        | Mental disorder /Merata<br>Mental disorder /Ka marata                | H<br>H      | RL<br>R     | F/D<br>D      | CBdr.<br>CE           |
| <i>Viscum tuberculatum</i> A. Rich.             | Viscaceae   | Digelo       | EL109        | Jaundice/ Alati                                                      | L           | L           | F             | Cdr.                  |
| <i>Vitex doniana</i> Sweet                      | Verbenaceae | Sari         | EL220        | Hepatitis/ Dukuba tiru<br>Kidney infection /Birbirti                 | H<br>H      | R<br>R      | F/D<br>F/D    | CR<br>CR              |
| <i>Warburgia ugandensis</i> Sprague             | Canellaceae | Befiti       | EL23         | Headache /Bowo                                                       | H           | SB          | F/D           | CP                    |
| <i>Withania somnifera</i> (L.) Dun.             | Solanaceae  | Unso         | EL206        | Pus from an ear /Dhukba guraa<br>Swelling of nose in mule/ Chachabsa | H<br>L      | SB<br>R     | D<br>F/D      | CR<br>CR              |
| <i>Woodfordia uniflora</i> (A. Rich.) Koehne    | Lythraceae  | Itecha       | EL181        | Evil eye /Buda<br>Epilepsy /Gagabdo<br>Retained placenta /Hobati     | H<br>H<br>L | R<br>R<br>L | D<br>F/D<br>F | CBdr.<br>CBdr.<br>Cdr |
| <i>Xanthium strumarium</i> L.                   | Asteraceae  | Konti katiro | EL5          | Hepatitis/ Liver<br>Tenia versicolor /Barley                         | H<br>H      | R<br>L      | F<br>F        | CBdr.<br>Crb          |
| <i>Ximenia americana</i> L.                     | Olacaceae   | Uhdualem     | EL50         | Evil eye /Buda<br>Impotence/ Dhirumalebi                             | L<br>H      | R<br>R      | F<br>F        | Cdr/Cp<br>CT          |
| <i>Ximenia caffra</i> Sond.                     | Olacaceae   | Hudha        | EL174        | Evil spirit /Jinni                                                   | H           | R           | F/D           | CR                    |
| <i>Zanthoxylum usambarense</i> (Engl.) Kokowara | Rutaceae    | Geda         | EL98         | Kidney infection/ Birbirti<br>Swelling of joints/ Gofla              | H<br>L      | SB<br>SB    | D<br>F        | CBdr.<br>CT           |

Additional file 2 (continued)

| Scientific name                                   | Family     | Local name | Herb. Vouch. | Disease treated (local name) | L/H | Part used | Form used | MPAP  |
|---------------------------------------------------|------------|------------|--------------|------------------------------|-----|-----------|-----------|-------|
| <i>Zinnia peruviana</i> L.                        | Asteraceae |            | EL240        | Diarrhoea /Bassa             | H   | R         | F/D       | CBdr. |
| <i>Ziziphus abyssinica</i><br>Hochst. ex A. Rich. | Rhamnaceae | Kankura    | EL8          | Jaundice/ Alati              | H   | RL        | F         | Cdr   |
| <i>Zornia apiculata</i> Milne-Redh.               | Fabaceae   | Kumbishi   | EL234        | Dhirumalebi/Impotence        | H   | RB        | D         | CBdr  |

Keys

Part used: Leaf, L.; Root, R; Fruit, F; Bark, B; Root bark, RB; Stem Bark, SB. For Livestock or human (L/H).

Form used: Dry, D; Fresh, F).

Methods of preparation and application (MPAP)\_ Crush and tie, CT; Crush boil and drink; CBdr; Cdr, Crush and drink; Crush and extract its content, Cex; Crush and paint, Cpa.
